# Supplementary material
Source: PubMed Central journal article supplement (PMC10353959)

Figure S1

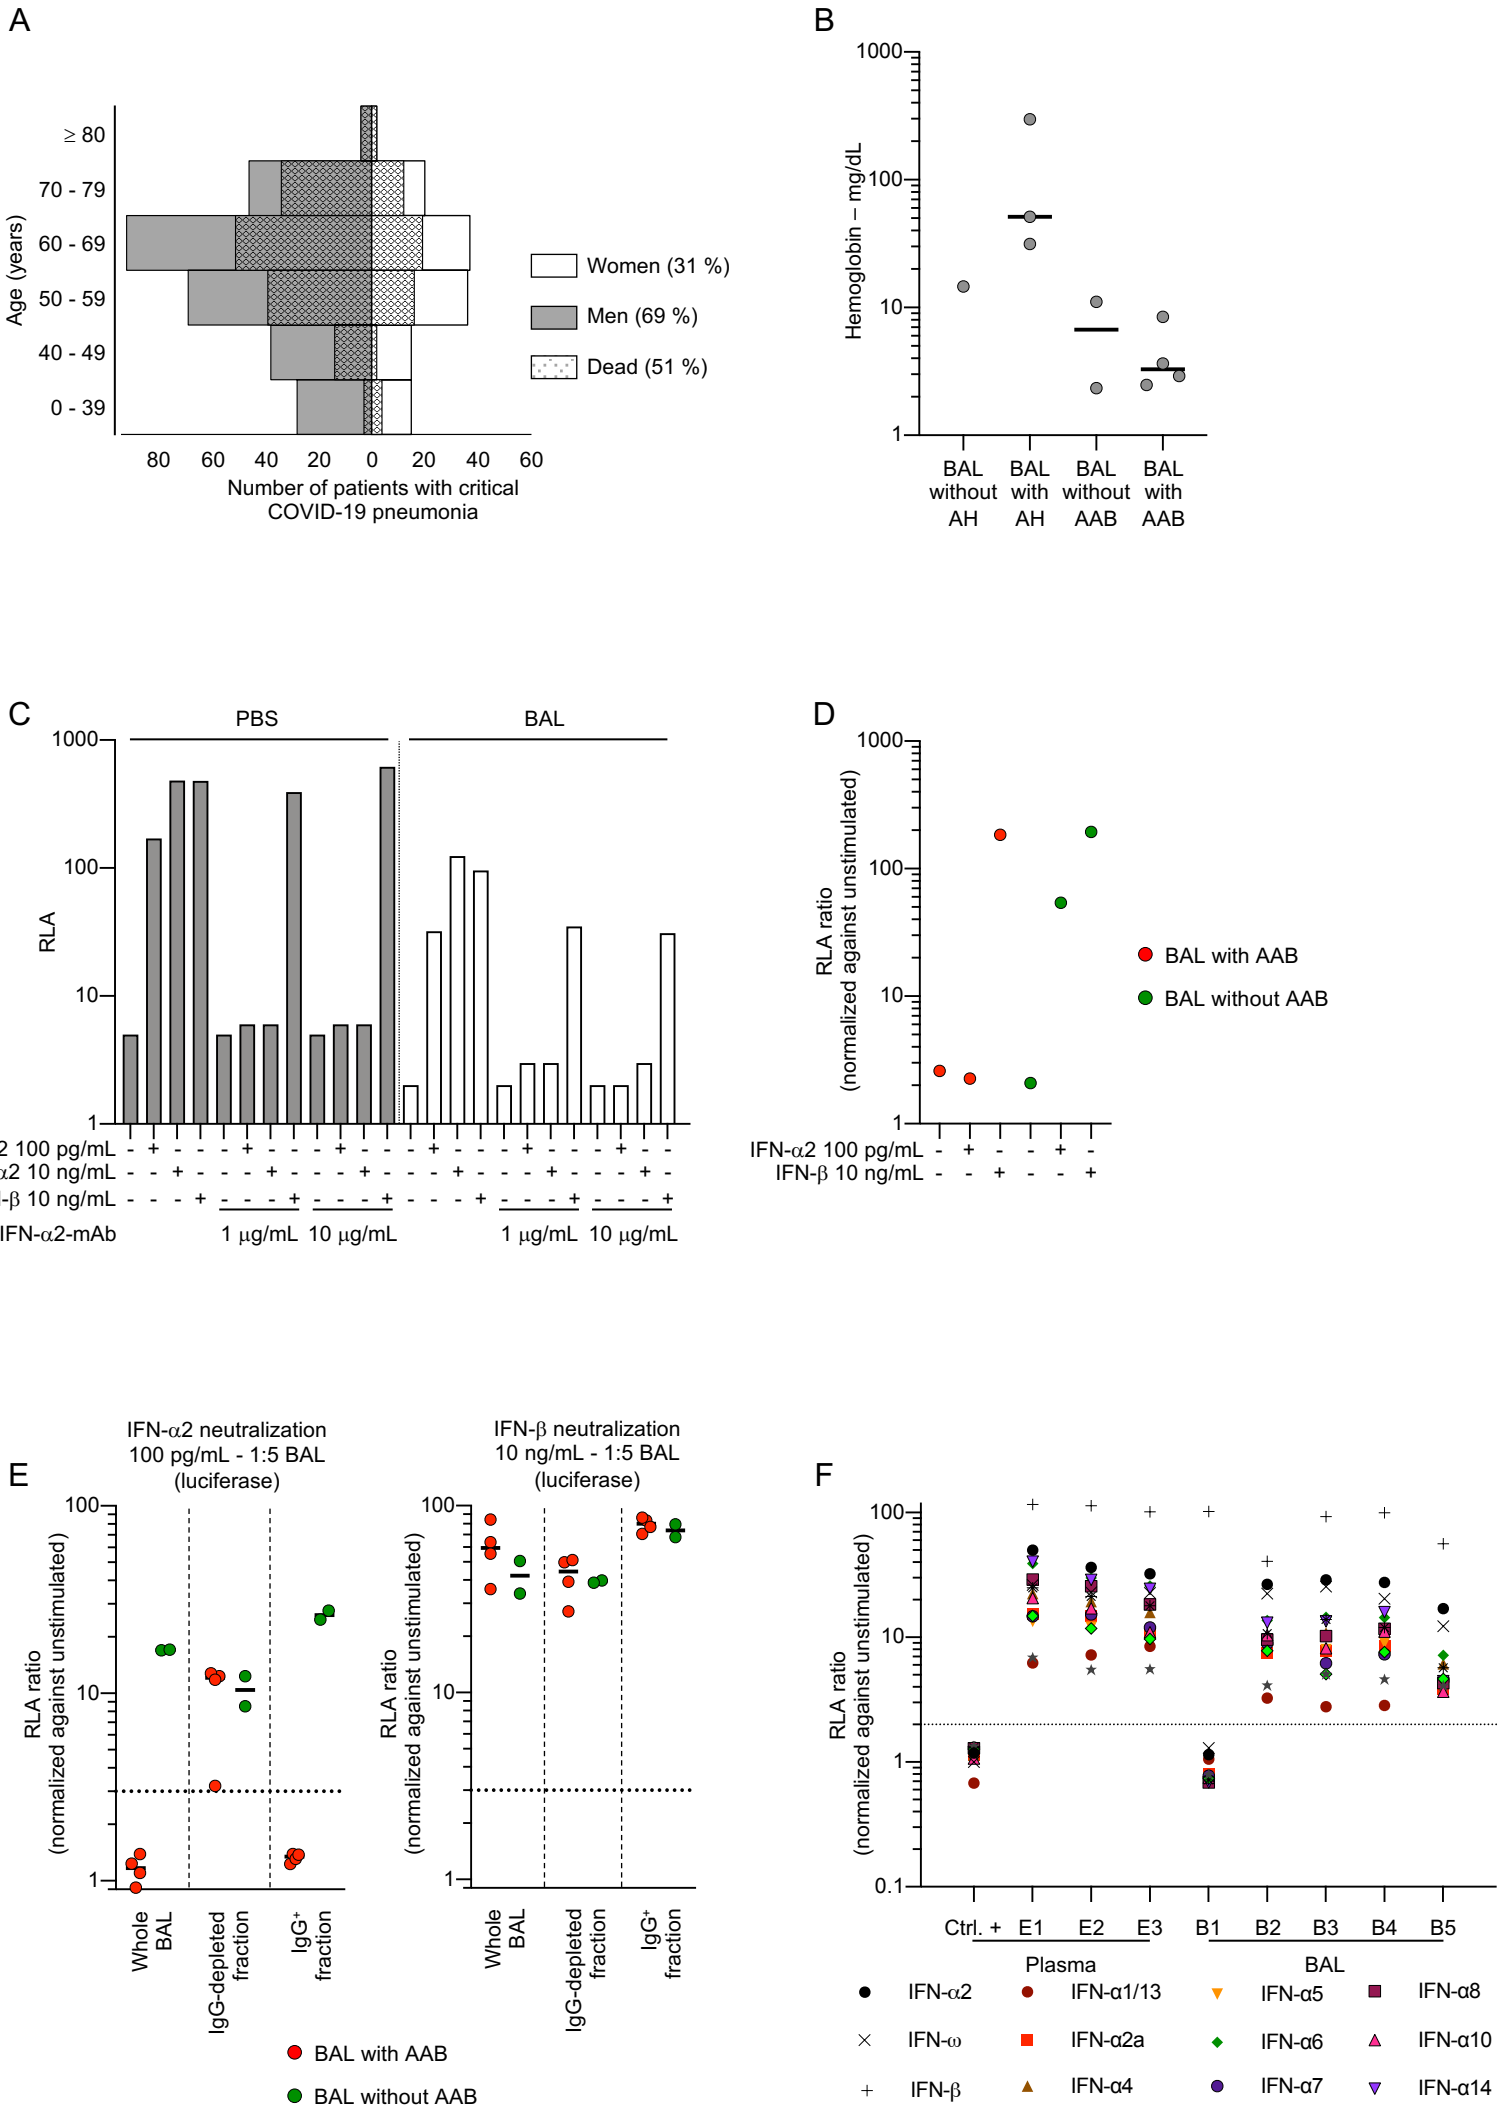

Supplement: 10875_2023_1512_MOESM1_ESM.pdf [file 10875_2023_1512_MOESM1_ESM.pdf]
